## Astrocytes release prostaglandin E2 to modify respiratory network activity

Department of Women's and Children's Health, Karolinska Institutet, and Karolinska University Hospital, Stockholm, Sweden

.....

## Abstract

Prostaglandin E2 (PGE2) released during hypercapnic challenge increases  $\text{Ca}^{2+}$  oscillation frequency in the chemosensitive parafacial respiratory group (pFRG/RTN). Here, we demonstrate that pFRG/RTN astrocytes are the PGE2 source. Two distinct astrocyte subtypes were found using transgenic mice expressing GFP and MrgA1 receptors in astrocytes. Although most astrocytes appeared dormant during time-lapse calcium imaging, a subgroup displayed persistent, rhythmic oscillating calcium activity. These active astrocytes formed a subnetwork within the respiratory network distinct from the neuronal network. Activation of exogenous MrgA1 receptors expressed in astrocytes tripled their calcium oscillation frequency activity in both the preBötzinger complex and pFRG/RTN. However, neurons in the preBötC were unaffected, whereas neuronal calcium oscillatory frequency in pFRG/RTN doubled. Notably, astrocyte activation in pFRG/RTN triggered local PGE2 release and blunted the hypercapnic response. Thus, astrocytes play an active role in respiratory rhythm modulation, modifying respiratory-related behavior through PGE2 release in the pFRG/RTN.

## Introduction

In the last decade, it has become evident that astrocytes are involved in respiratory behavior; electrically active astrocytes are present in the brainstem respiratory center the preBötzinger Complex (preBötC) (Grass, Pawlowski et al. 2004) and exhibit rhythmic calcium ( $\text{Ca}^{2+}$ ) oscillations associated with the respiratory-related neuronal rhythm (Schnell, Freseman et al. 2011, Okada, Sasaki et al. 2012). Further, brainstem astrocytes respond to changes in blood gas levels (Angelova, Kasymov et al. 2015), especially in the chemosensitive region the parafacial respiratory group/retrotrapezoid nucleus (pFRG/RTN) (Huckstepp, Bihi et al. 2010). During the hypercapnic response, carbon dioxide ( $\text{CO}_2$ ) causes a vesicle-dependent release of ATP from astrocytes (Fukuda, Honda et al. 1978, Erlichman, Leiter et al. 2010, Gourine, Kasymov et al. 2010, Huckstepp, Bihi et al. 2010, Turovsky, Karagiannis et al. 2015, Turovsky, Theparambil et al. 2016). ATP may also be released in a vesicle independent manner through  $\text{CO}_2$ -sensitive gap junctions (Huckstepp, Bihi et al. 2010, Huckstepp, Eason et al. 2010, Meigh, Greenhalgh et al. 2013). ATP then increases inspiratory frequency through actions on P2 receptors located in neurons in both the pFRG/RTN and the preBötC (Lorier, Huxtable et al. 2007, Gourine, Kasymov et al. 2010). Acting via EP3 receptors, prostaglandin E2 (PGE2) also alters respiratory network activity by inhibiting signaling frequency in the preBötC while increasing it in the pFRG/RTN (Forsberg, Horn et al. 2016). Additionally, the response to hypercapnic and hypoxic challenges are blunted by PGE2 (Hofstetter, Saha et al. 2007, Siljehav, Olsson Hofstetter et al. 2012, Siljehav, Hofstetter et al. 2015). Because PGE2 is released through gap junctions during hypercapnia, and since some astrocytes in the pFRG/RTN express the primary enzyme involved in PGE2 synthesis (i.e., mPGEs-1) (Forsberg, Horn et al. 2016), we hypothesized that hypercapnia induces astrocytes to release PGE2 in addition to ATP. Thus, astrocytes may also modulate respiratory-related network rhythms via the downstream actions of PGE2.

To investigate the role of astrocytes in respiratory rhythm-generating networks and determine whether astrocytes release PGE<sub>2</sub>, we utilized organotypic brainstem slice cultures (Forsberg, Horn et al. 2016, Phillips, Herly et al. 2016) of B6.Cg-Tg(hGFAP-tTA::tetO-MrgA1)<sup>1</sup><sup>Kdmc/Mmmh</sup> mice (GFAP<sup>MrgA1+</sup>) in which green fluorescent protein (GFP) and the MrgA1 receptor (MrgA1R) were expressed under control of the promoter for glial fibrillary acidic protein (GFAP), a generally used marker for astrocytes (Brenner, Kisseberth et al. 1994). The MrgA1R is an endogenous G<sub>q</sub>-coupled receptor that is normally not expressed in the brain. Rather, MrgA1R is expressed exclusively in the dorsal root ganglion nociceptive sensory terminals of the spinal cord (Fiacco, Agulhon et al. 2007) and is activated by RF peptides (Dong, Han et al. 2001). Consequently, we could selectively activate brainstem astrocytes using synthetic Phe-Leu-Arg-Phe-amide (FLRF) (Young, Platel et al. 2010, Cao, Li et al. 2013).

## Results and Discussion

Expression of GFP in the pFRG/RTN and preBötC of the GFAP<sup>MrgA1+</sup> mice was evident (**Figure 1**), and GFP was co-localized with GFAP immunolabeling (**Figure 1b and h**, n = 11 slices; see **Table 1** for the number of times each experiment was conducted). Although subgroups of GFAP-expressing cells have been previously defined using fluorescence intensity (Grass, Pawlowski et al. 2004), we were unable to detect measurable differences in the GFP fluorescence among our samples. The astrocyte and oligodendrocyte marker S100β was expressed by 12% ± 3% of the GFP-positive cells (n = 13 slices). Conversely, 92% ± 4% of the S100β-positive cells also expressed GFP (**Figure 1c and i**, n = 13 slices). The GFP-positive cells followed the neuronal spread but expressed neither the neuronal markers NK1R or MAP2 (**Figure 1d, e and j, k**, n = 21 slices) nor the microglial marker Iba1 (**Figure 1f and l**, n = 11 slices). No GFP expression was detected in littermate controls (WT; **Figure 1m**, n =

94 12 slices). These findings confirm that the GFAP-driven expression of GFP (and thus  
 95 MrgA1R) is astrocyte specific, as expected (Brenner, Kisseberth et al. 1994, Fiacco, Agulhon  
 96 et al. 2007, Cao, Li et al. 2013). However, the antibodies in our immunohistochemistry  
 97 experiments penetrated only approximately 20% of the brainstem slice thickness (**Figure 1g**),  
 98 which must be considered when the organotypic slice culture method is used.

99

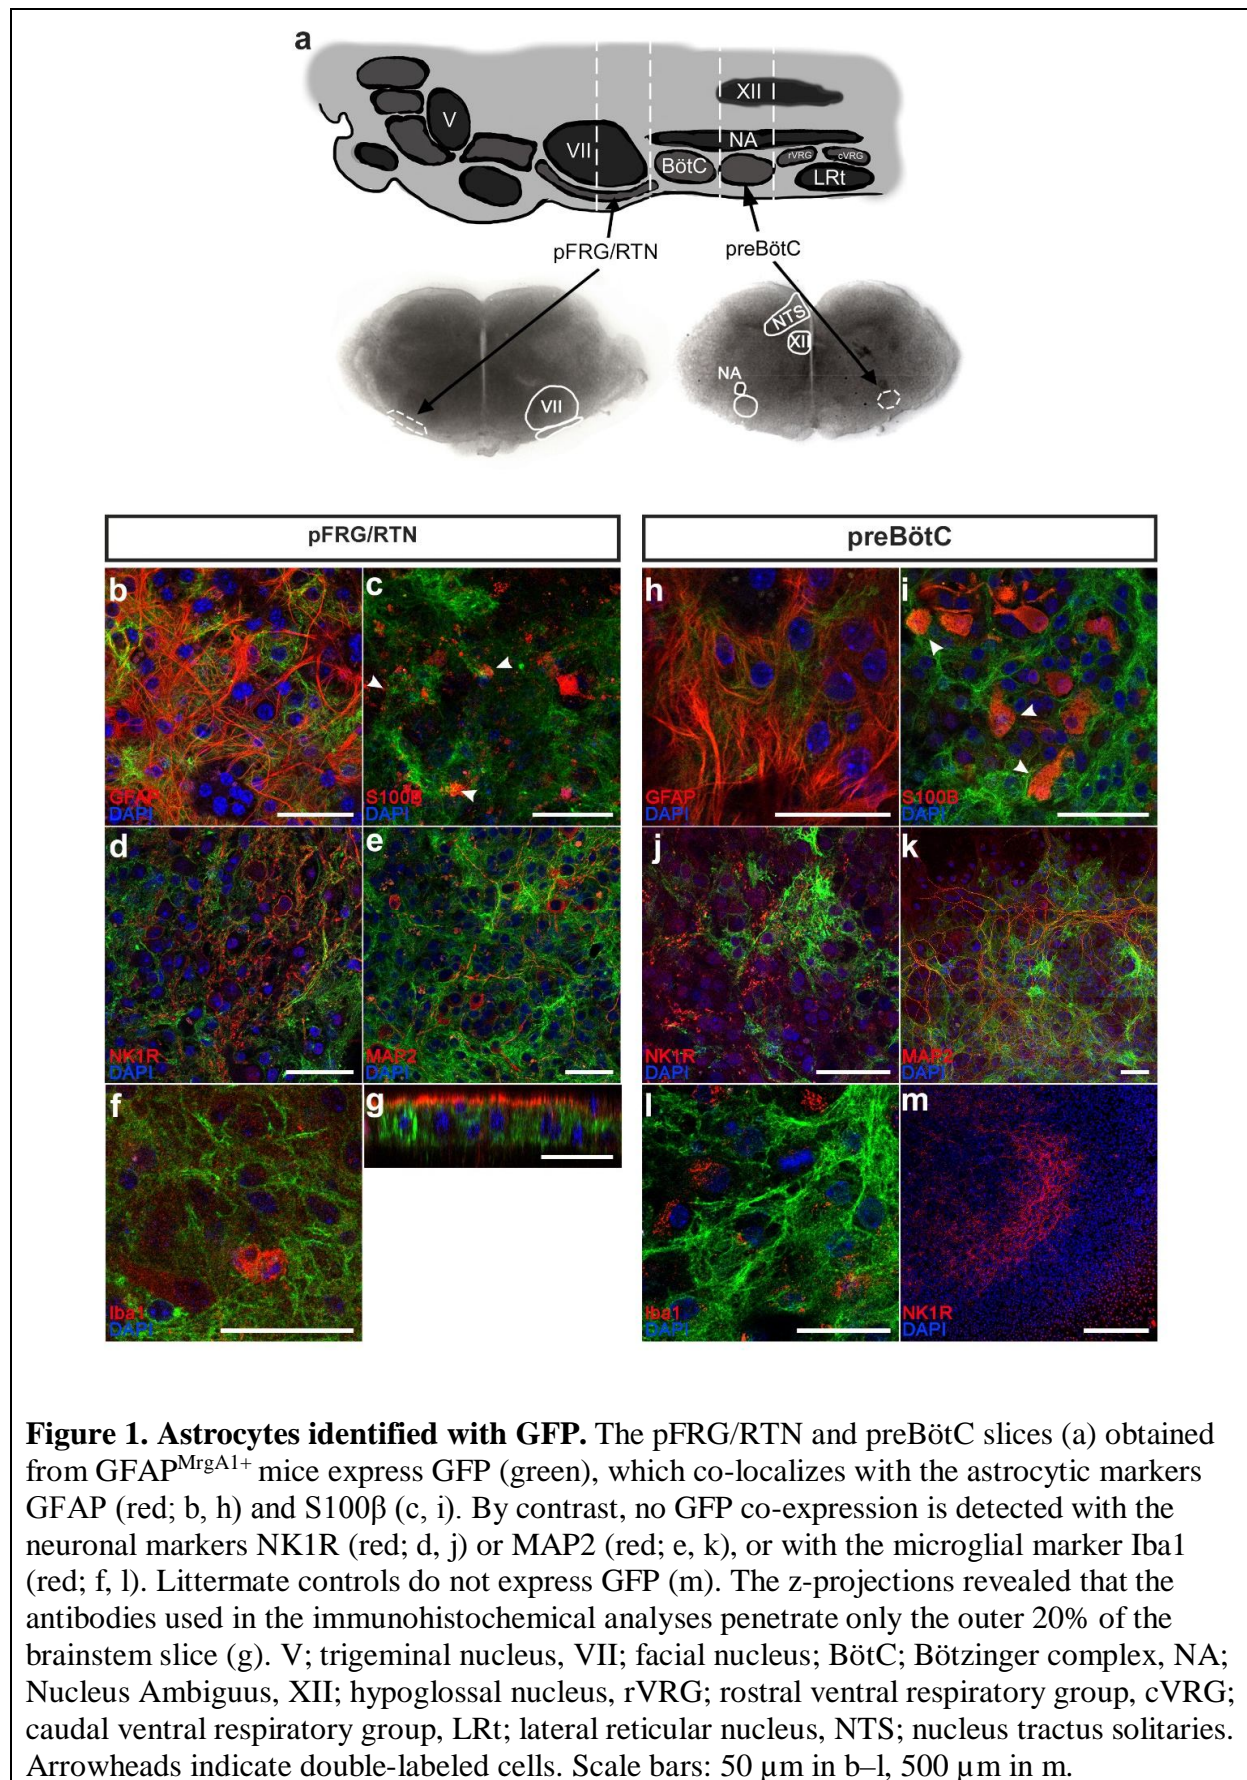



The  $\text{Ca}^{2+}$  time-lapse imaging of brainstem slices derived from both GFAP<sup>MrgA1+</sup> and WT control mice displayed similar average  $\text{Ca}^{2+}$  signaling frequency and network structure. Thus, the induced expression of GFP and MrgA1R did not affect respiratory network activity or function. Taken together with the results of the immunohistochemical expression analyses, this demonstrates that the MrgA1 mouse line has astrocyte-specific expression of the inserted genes, which display no physiological effects, making this mouse line useful for investigating the role of astrocytes in respiratory networks.

We examined the  $\text{Ca}^{2+}$ -signaling activity of cells in the pFRG/RTN and in the preBötC and identified two subgroups among the GFP-expressing astrocytes: cells with a rhythmic  $\text{Ca}^{2+}$ -signaling pattern, and cells that appeared inactive, that is, the Fura-2 fluorescence intensity in these cells was stable over time. A similar subgrouping of astrocytes, with approximately 10% exhibiting calcium transients preceding inspiratory-related neuronal signals, has been suggested previously on the basis of both electrophysiological and  $\text{Ca}^{2+}$  imaging methods (Grass, Pawlowski et al. 2004, Schnell, Fresemann et al. 2011, Oku, Fresemann et al. 2016). The present study also found that the majority of the astrocytes appeared inactive (**Figure 2a and b**;  $82\% \pm 9\%$  in the pFRG/RTN,  $n = 19$  slices;  $87\% \pm 7\%$  in the preBötC,  $n = 22$  slices). In the preBötC, the proportion of active astrocytes was similar to that detected by Schnell and colleagues (Schnell, Fresemann et al. 2011), but lower than that reported by both Grass and colleagues (Grass, Pawlowski et al. 2004) and Oku and colleagues (Oku, Fresemann et al. 2016). However, our data are presented as the proportion per respiratory network, whereas previous studies evaluated the proportion of the total number of recorded cells, independent of individual networks. To our knowledge, the present study is the first to describe active and inactive astrocytes within the pFRG/RTN. Notably, we observed the following difference between the pFRG/RTN and the preBötC:  $40\% \pm 12\%$  of the active cells in pFRG/RTN were astrocytes, whereas only  $20\% \pm 9\%$  of active cells in the

preBötC were astrocytes (**Figure 2a and b**,  $p < 0.05$  when comparing the pFRG/RTN and the preBötC,  $n = 41$  slices; see **Table 2** for a list of all statistical tests used for all comparisons in the present study).

On the basis of a correlated cell activity analysis (Smedler, Malmersjö et al. 2014, Forsberg, Horn et al. 2016), we determined that the active astrocytes within the pFRG/RTN and within the preBötC formed specific networks. These networks differed from those of non-astrocytes, that is, neurons (**Figure 3a and b**; see **Table 1** for the number of times each experiment was conducted), but displayed similar network structures (**Figure 3c and e**). The astrocytic and neuronal networks connected with each other at multiple nodes, and together they formed the respiratory networks of the pFRG/RTN and of the preBötC. In the pFRG/RTN, astrocytes constituted  $37\% \pm 13\%$  of the total network (number of correlating cell pairs), whereas astrocytes made up only  $16\% \pm 5\%$  of the preBötC network ( $p < 0.05$  when comparing the pFRG/RTN and the preBötC; **Figure 3a, d, b and f**). We also observed a significantly larger number of connections between astrocytes and neurons in the pFRG/RTN than in the preBötC ( $33\% \pm 12\%$  vs.  $24\% \pm 11\%$  of all correlating cell pairs,  $p < 0.05$ ; **Figure 3a, b, d and f**). Thus, astrocytes are both independently active and part of the respiratory networks, but appear to have different actions in the two central pattern generators.



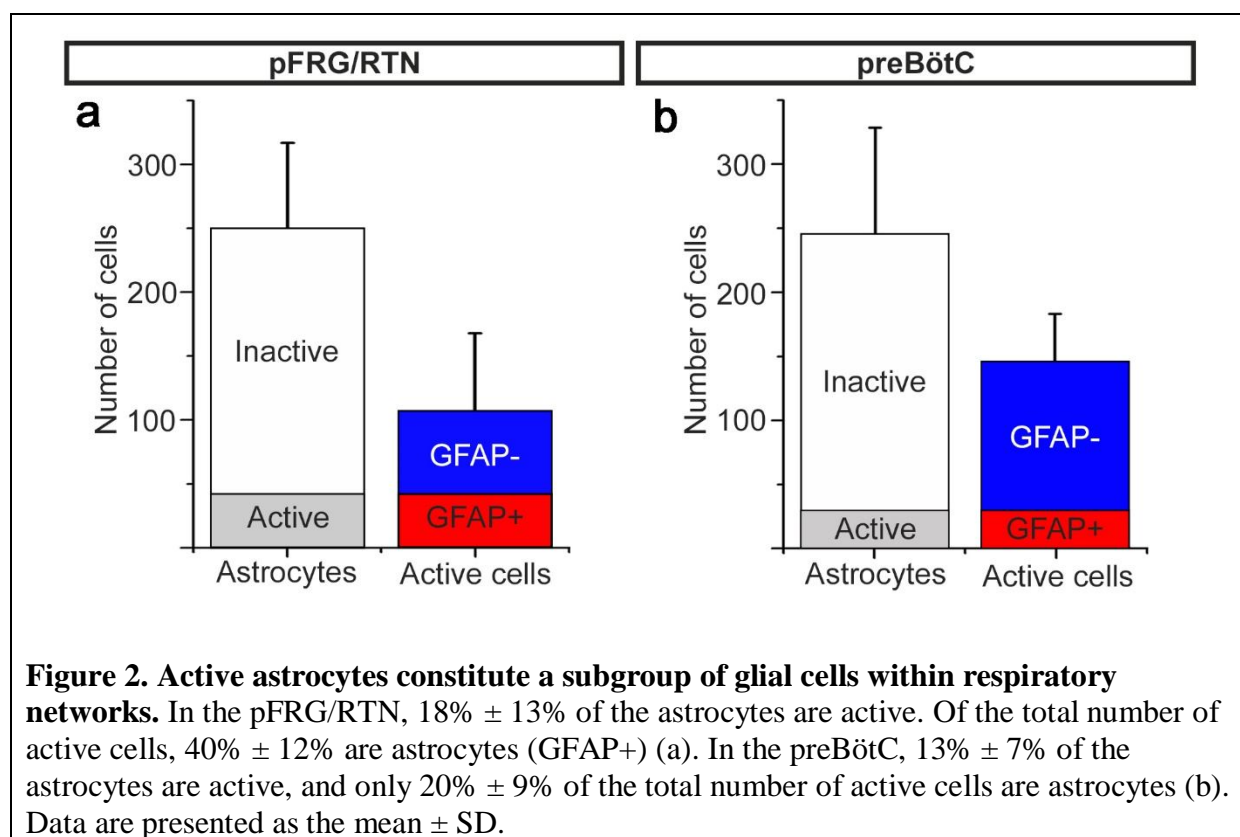

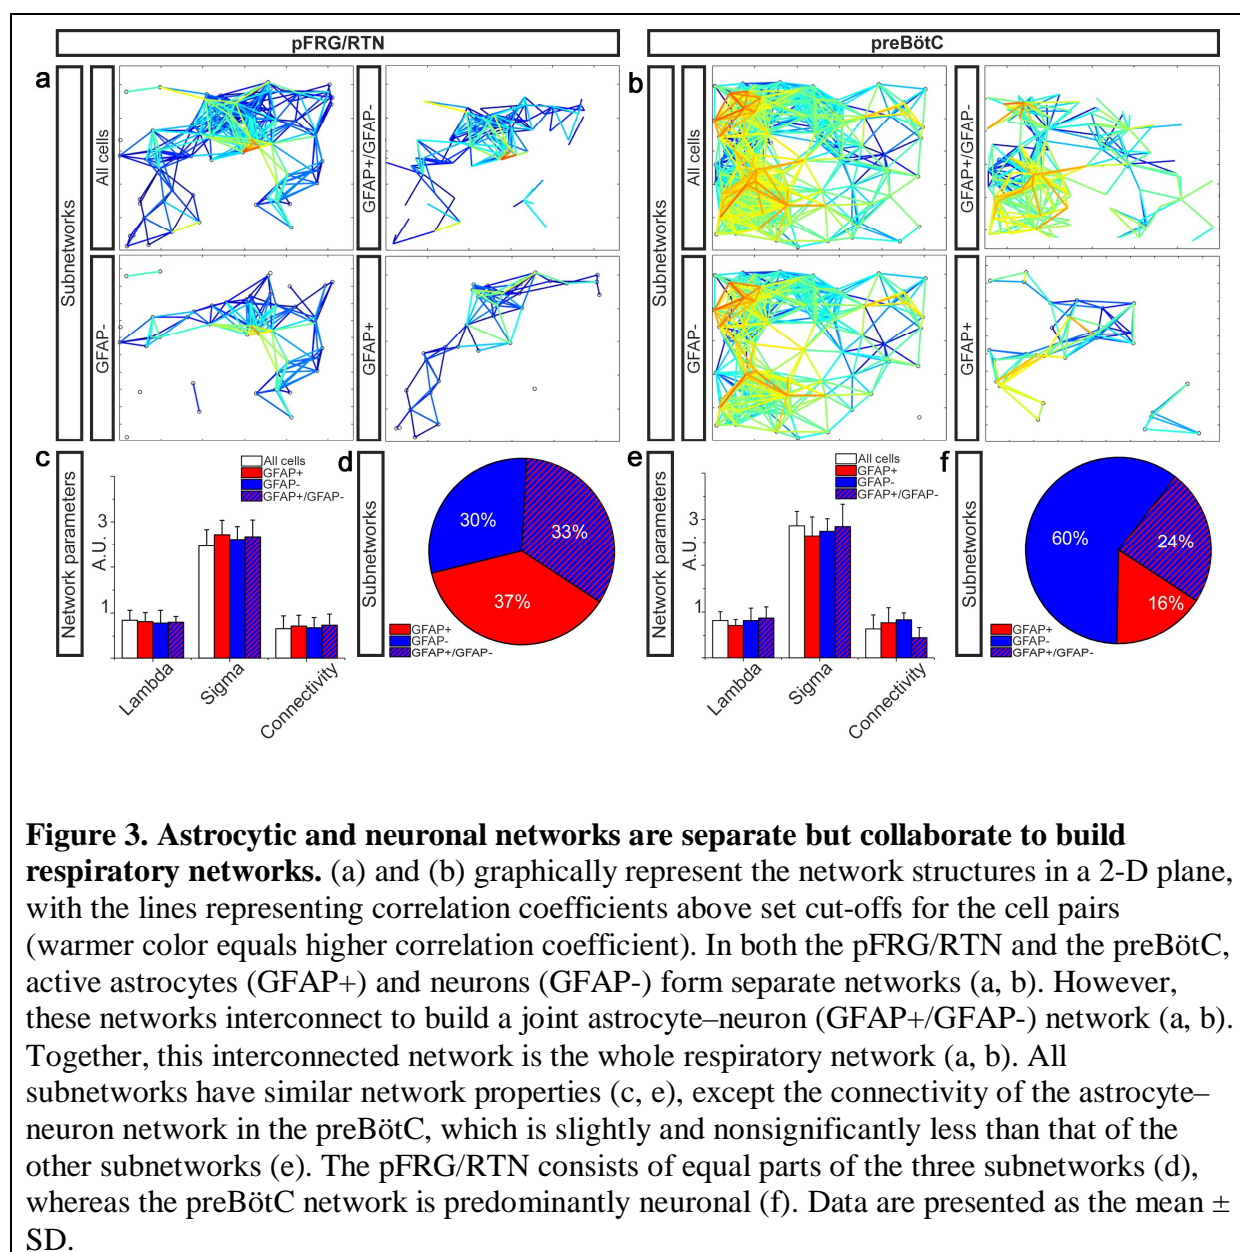

**Figure 3. Astrocytic and neuronal networks are separate but collaborate to build respiratory networks.** (a) and (b) graphically represent the network structures in a 2-D plane, with the lines representing correlation coefficients above set cut-offs for the cell pairs (warmer color equals higher correlation coefficient). In both the pFRG/RTN and the preBötC, active astrocytes (GFAP+) and neurons (GFAP-) form separate networks (a, b). However, these networks interconnect to build a joint astrocyte–neuron (GFAP+/GFAP-) network (a, b). Together, this interconnected network is the whole respiratory network (a, b). All subnetworks have similar network properties (c, e), except the connectivity of the astrocyte–neuron network in the preBötC, which is slightly and nonsignificantly less than that of the other subnetworks (e). The pFRG/RTN consists of equal parts of the three subnetworks (d), whereas the preBötC network is predominantly neuronal (f). Data are presented as the mean  $\pm$  SD.

Under control conditions, astrocytes displayed a low oscillating frequency ( $19 \pm 8$  mHz in the preBötC ( $n = 22$  slices) vs.  $18 \pm 7$  mHz in the pFRG ( $n = 19$  slices); difference not statistically significant), similar to that described previously for active astrocytes (Grass, Pawlowski et al. 2004, Schnell, Freseman et al. 2011, Okada, Sasaki et al. 2012, Oku, Freseman et al. 2016). The frequency displayed by the astrocytes in each region was lower than that shown by the neurons in the respective regions (preBötC:  $90 \pm 40$  mHz,  $n = 22$  slices,  $p < 0.05$  compared with astrocytes; pFRG:  $106 \pm 58$  mHz,  $n = 19$  slices,  $p < 0.05$  compared with astrocytes). We did not register nerve output signals in the present study and can therefore not evaluate whether astrocytic signaling was phase-locked with the respiratory output.

Next, we activated the GFAP<sup>MrgA1+</sup> astrocytes by applying the MrgA1R ligand FLRF, which increased the Ca<sup>2+</sup>-signaling frequency of astrocytes in both the pFRG/RTN and the preBötC (**Figure 4a and b**). In the pFRG/RTN, astrocyte activation also induced an increase in the signaling frequency of the non-astrocytes (**Figure 4a and b**). This is in contrast to the preBötC, wherein non-astrocytes retained their Ca<sup>2+</sup>-signaling frequency independent of astrocyte stimulation (**Figure 4a and b**). Inactive astrocytes showed a single Ca<sup>2+</sup> peak shortly after the application of FLRF, but returned to the inactive state within 10 s (**Figure 4a**). The stimulation of astrocytes did not affect the network structures of the astrocytic, neuronal, or complete respiratory networks (**Figure 4c**). Astrocytes in slices derived from WT mice did not react to the application of FLRF (**Figure 4b**).

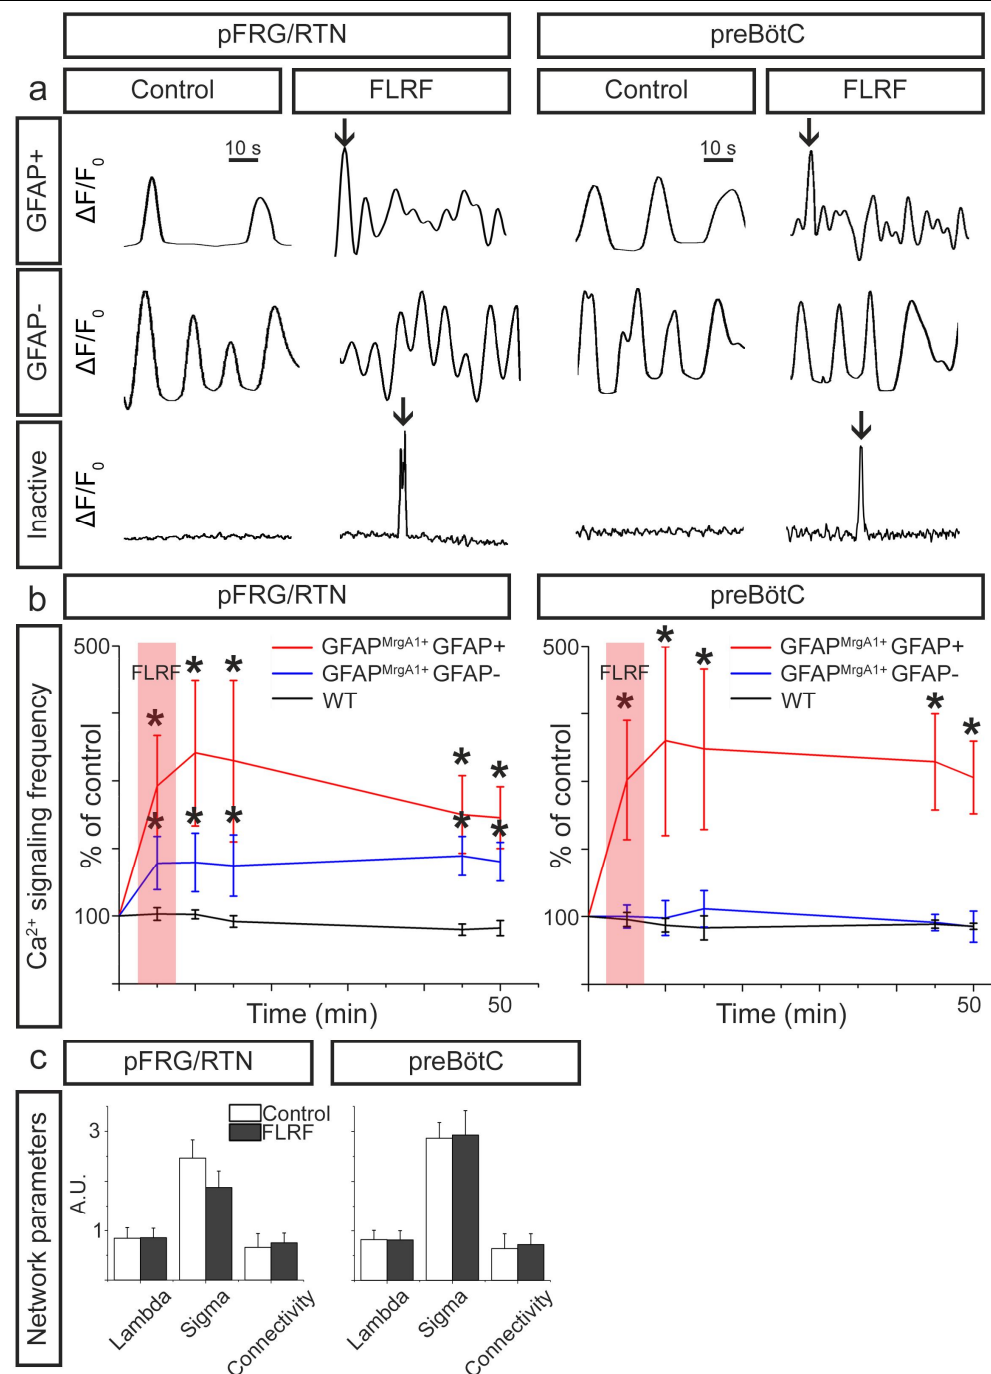

**Figure 4. Astrocytes control neurons in the pFRG/RTN.** (a) Individual 1 min calcium traces ( $\Delta F/F_0$  over time, band pass filtered 0.01–0.15 Hz) during the control period and after the application of the MrgA1R ligand FLRF. Activation of astrocytes through addition of FLRF increases calcium-signaling frequency of astrocytes in both the pFRG/RTN and the preBötC (b, red trace). In the pFRG/RTN, neuronal calcium-signaling frequency increases after astrocyte activation (b, blue trace). This is not observed in the preBötC (b, blue trace). Littermate controls (WT) do not respond to FLRF (b, black trace). Network properties are not affected by addition of FLRF (c). Data are presented as the mean  $\pm$  SD. \* $p < 0.05$  compared to their respective controls.

While these findings suggest that astrocytes do not directly modify neuronal activity in the preBötC, astrocytes may, nonetheless, be important for the maintenance of the respiratory rhythm generation in this complex. For instance, the astrocyte inhibitor methionine sulfoximine depresses breathing in vivo (Young, Dreshaj et al. 2005), and glial inhibitors (fluorocitrate, fluoroacetate, and methionine sulfoximine) reduce respiratory-related activity in the preBötC in vitro (Erlichman, Li et al. 1998, Huxtable, Zwicker et al. 2010). In addition, hypoxia can induce a  $\text{Ca}^{2+}$  influx in preBötC astrocytes, inducing a release of ATP (Gourine, Llaudet et al. 2005, Angelova, Kasymov et al. 2015). This helps to maintain the inspiratory-related rhythm generation in the preBötC during post-hypoxic depression (Gourine, Llaudet et al. 2005). Although we did not measure an increase in neuronal network burst frequency after astrocyte-specific activation, we did not test responses under hypoxic conditions.

Our data suggest that, in contrast to their function in the preBötC, astrocytes in the pFRG/RTN modulate respiratory network activity. This corroborates the results of previous studies that have demonstrated the involvement of astrocytes in chemosensitivity through purinergic signaling (Erlichman, Leiter et al. 2010, Gourine, Kasymov et al. 2010, Huckstepp, Bihi et al. 2010, Gourine and Kasparov 2011, Angelova, Kasymov et al. 2015). In one of our recent articles, we suggested that astrocytes release PGE2 (in addition to ATP) in response to a hypercapnic challenge (Forsberg, Horn et al. 2016). This would in part explain the interaction between chemosensitivity and the inflammatory system observed in several studies (Hofstetter, Saha et al. 2007, Siljehav, Olsson Hofstetter et al. 2012, Siljehav, Shvarev et al. 2014, Forsberg, Horn et al. 2016). Moreover, in human neonates, rapid elevation of brainstem PGE2 during infectious events is associated with and may explain the initial presenting symptoms of infection, which are apnea, bradycardia, and desaturation (Siljehav, Hofstetter et al. 2015).

Because a hypercapnic challenge triggers a gap junction mediated release of PGE2 (Forsberg, Horn et al. 2016), we hypothesized that astrocyte stimulation would trigger a similar release. Indeed, we found that after FLRF application, the PGE2 levels in the artificial cerebrospinal fluid (aCSF) doubled in the pFRG/RTN (**Figure 5a**,  $n = 8$  slices,  $p < 0.05$ ). The increase was transient, similar to the PGE2 release that occurs during hypercapnia (Forsberg, Horn et al. 2016). By contrast, the PGE2 levels remained unaffected by FLRF application in the GFAP<sup>MrgA1+</sup> preBötC slices ( $n = 3$  slices) and both the pFRG/RTN and preBötC regions in the WT slices ( $n = 2$  slices for each region). These results indicated that the pFRG/RTN contains chemosensitive astrocytes that release PGE2 upon hypercapnic challenge. The physiological effect of the released PGE2 is likely multifactorial. We previously demonstrated that PGE2 is involved in the stimulation of the pFRG/RTN (Forsberg, Horn et al. 2016), similar to the effects of ATP (Gourine, Kasymov et al. 2010). Although ATP counteracts the vasodilatory effect of CO<sub>2</sub>/H<sup>+</sup> during hypercapnia in the ventral brainstem (Hawkins, Takakura et al. 2017), the role of PGE2 in the microcircuits controlling brainstem blood flow will require further investigation.

We also determined that pre-activation of astrocytes blunts the hypercapnic response in the pFRG/RTN (**Figure 5b**,  $n = 8$  slices). This result suggested that existing PGE2, and likely other gliotransmitters, is released after activation, depleting the stores. Extracellular pH is retained during hypercapnia in our system (Forsberg, Horn et al. 2016), but CO<sub>2</sub> can pass over the cell membrane and decrease the intracellular pH. This decreased pH drives bicarbonate and sodium ions into the cell, triggering a Ca<sup>2+</sup> influx (Turovsky, Theparambil et al. 2016). In parallel, CO<sub>2</sub> can directly modify connexin 26 hemichannels to induce an open state (Huckstepp, Bihi et al. 2010, Meigh, Greenhalgh et al. 2013). Thus, it is possible that the mechanism behind the gliotransmitter release during hypercapnic challenge is different from that of the FLRF-induced activation and Ca<sup>2+</sup> influx. The design of the present study could

not discern between PGE2 released from active and inactive astrocytes or determine whether PGE2 directly affected neurons or acted via intermediate astrocytes. In the pFRG/RTN, prostaglandin EP3 receptors have been found on both neurons and astrocytes (Forsberg, Horn et al. 2016). Thus, the different pathways as well as the kinetics associated with the effects of PGE2 will require further investigation. Hypercapnia did not affect the preBötC activity (**Figure 5c**, n = 6 slices), consistent with the results of our previous study (Forsberg, Horn et al. 2016). In summary, these results indicated that the pFRG/RTN contains astrocytes that are able to react to CO<sub>2</sub> and release PGE2 (and possibly other gliotransmitters) to modify the behavior of the neuronal population. This type of astrocytic responsiveness and modifying effect was not detected in the preBötC.



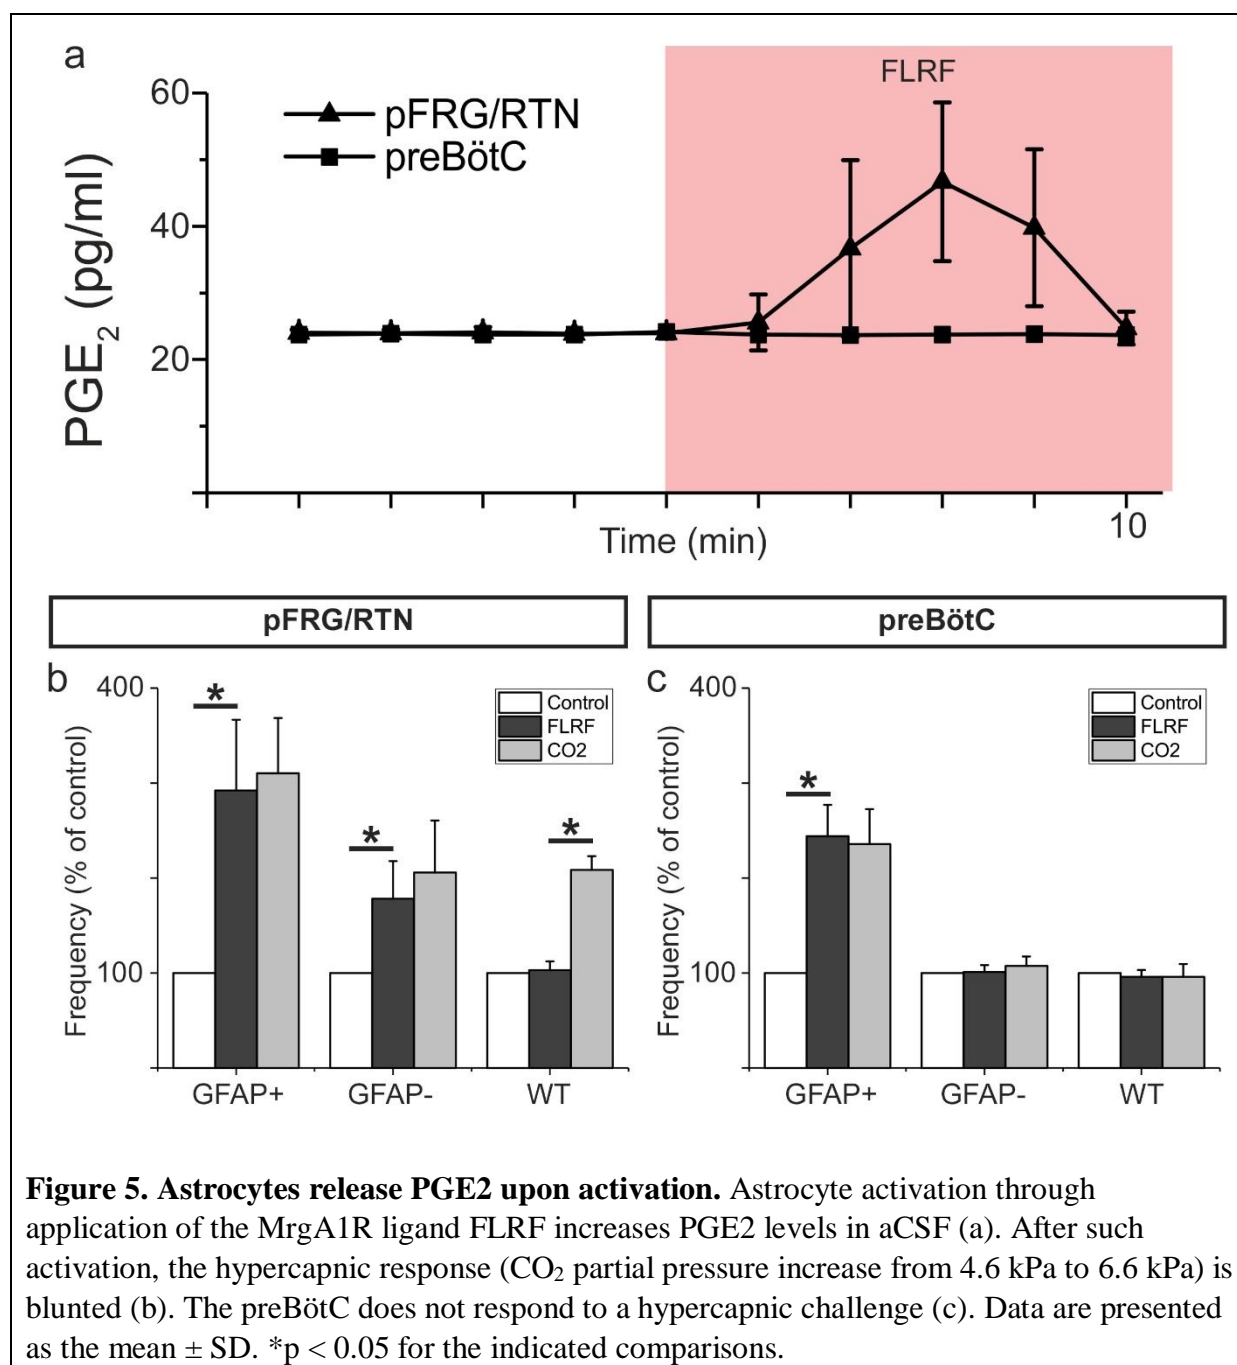

Taken together, our results led us to conclude that a subgroup of astrocytes with oscillatory  $\text{Ca}^{2+}$  activity interacted with and was an essential part of the respiratory neural networks. We observed that almost half of the cells in the pFRG/RTN network were astrocytes and that these astrocytes could entrain the neuronal rhythm, suggesting that pFRG/RTN astrocytes are a source of gliotransmitters that modify respiratory activity. Moreover, a transient release of PGE2 induced by a  $\text{Ca}^{2+}$  influx in the astrocytes of the pFRG/RTN substantially reduced the subsequent hypercapnic response, suggesting a central role of PGE2 as a gliotransmitter in chemosensitivity. Thus, subgroups of astrocytes participate in the respiratory rhythm of both the preBötC and the pFRG/RTN, and modify respiratory network behavior in the pFRG/RTN. Therefore, we suggest that astrocytes constitute an important link between the respiratory and inflammatory systems, and stand out as a potential target for the treatment of central respiratory dysfunction.

## Materials and Methods

### Subjects

Mice expressing green fluorescent protein (GFP) under the GFAP promoter were used. Frozen sperm from the GFAP-tTA (Lin, Kemper et al. 2004, Pascual, Casper et al. 2005) and tetO-Mrgpra1 (Fiacco, Agulhon et al. 2007) mouse strains were purchased from the Mutant Mouse Resource and Research Center (MMRRC) supported by the National Institutes of Health. The strains were re-derived by the Karolinska Center for Transgene Technologies, and the offspring were crossed as previously described (Fiacco, Agulhon et al. 2007). The double transgenic B6.Cg-Tg(hGFAP-tTA::tetO-MrgA1)<sup>1Kdmc/Mmmh</sup> mice were identified by polymerase chain reaction analyses according to instructions provided by the MMRRC.

All mice were reared by their mothers under standardized conditions with a 12 h light–dark cycle. The mice were allowed food and water ad libitum. The studies were performed in accordance with European Community Guidelines and approved by the regional ethics committee. The animals were reared and kept in the Department of Comparative Medicine at the Karolinska Institute in Stockholm, Sweden.

### Brainstem organotypic culture

Mouse pups were used at postnatal day 3 for the establishment of brainstem organotypic slice cultures (Herlenius, Thonabulsombat et al. 2012, Forsberg, Horn et al. 2016). Transverse slices (300 µm thick) were maintained in culture for 7 to 14 days. Slices were selected by using online anatomical references (Ruangkittisakul, Schwarzacher et al. 2006, Ruangkittisakul, Panaitescu et al. 2011, Ruangkittisakul, Kottick et al. 2014).

### Immunohistochemistry

The immunohistochemistry procedure was the same as that described previously (Forsberg, Horn et al. 2016). ). The primary antibodies used were mouse anti-microtubule associated protein 2 (MAP2; Invitrogen, cat. no. P11137), rabbit anti-neurokinin 1 receptor (NK1R; Sigma-Aldrich, St. Louis, MO, USA, cat no. S8305), mouse anti-GFAP (Chemicon, Temecula, CA, USA, cat no. MAB360), rabbit anti-S100 $\beta$  (Millipore; cat. no. 04-1054), rabbit anti-Iba1 (Wako, Japan; cat. no. 019-19741) and goat anti-GFP (Abcam, Cambridge, United Kingdom; cat. no. Ab6673). The secondary antibodies used were Alexa Fluor Plus 555 goat anti-mouse IgG (Thermo Fisher Scientific, Waltham, MA, USA; cat. no. A32737), Alexa Fluor Plus 555 goat anti-rabbit IgG (Thermo Fisher Scientific, Waltham, MA, USA; cat. no. A32732), Alexa Fluor 555 donkey anti-rabbit (Thermo Fisher Scientific, Waltham, MA, USA; cat. no. A31572) and Alexa Fluor 488 donkey anti-goat (Thermo Fisher Scientific, Waltham, MA, USA; cat. no. A11055). Negative control tissue incubated in the absence of primary antibodies showed no staining.

### **Ca<sup>2+</sup> time-lapse imaging**

For Ca<sup>2+</sup> imaging, Fura-2 AM (Thermo Fisher Scientific, Waltham, MA, USA; cat. no. F1201) dissolved in DMSO (Sigma-Aldrich, St. Louis, MO, USA, cat. no. D2650) was used at 166  $\mu$ M in aCSF (containing in mM: 150.1 Na<sup>+</sup>, 3 K<sup>+</sup>, 2 Ca<sup>2+</sup>, 2 Mg<sup>2+</sup>, 135 Cl<sup>-</sup>, 1.1 H<sub>2</sub>PO<sub>4</sub><sup>-</sup>, 25 HCO<sub>3</sub><sup>-</sup> and 10 glucose) together with 0.02% pluronic acid (Thermo Fisher Scientific, Waltham, MA, USA cat. no. P3000MP). To localize the preBötC or the pFRG/RTN, tetramethylrhodamine-conjugated substance P (TMR-SP; Biomol, Oakdale, NY, USA) was used at a final concentration of 3  $\mu$ M in aCSF. The TMR-SP solution was placed on top on the brainstem slice and incubated for 10 min at 37°C in an atmosphere of 5% CO<sub>2</sub>. Brainstem slices were incubated in the TMR-SP solution for 10 min at 37°C in an atmosphere of 5% CO<sub>2</sub>. The TMR-SP solution was then replaced with 1.5 ml of 166  $\mu$ M Fura-2 solution. The

Fura-2 solution was incubated for 30 min at room temperature. Before imaging, the slice was washed with aCSF for 10 min (32°C, 5% CO<sub>2</sub>).

During time-lapse imaging, slices were kept in an open chamber perfused with aCSF (1.5 mL/min), as described previously (Forsberg, Horn et al. 2016). The exposure time was set to 100 ms, with an imaging interval of 0.5 s. During imaging, FLRF (10 µM in 0.1% DMSO in aCSF; Innovagen, Lund, Sweden) was added continuously for 5 min after a control period. A subset of slices was exposed to isohydric hypercapnia, with the aCSF adjusted with a high-bicarbonate buffer concentration (in mM: 150.1 Na<sup>+</sup>, 3 K<sup>+</sup>, 2 Ca<sup>2+</sup>, 2 Mg<sup>2+</sup>, 111 Cl<sup>-</sup>, 1.1 H<sub>2</sub>PO<sub>4</sub><sup>-</sup>, 50 HCO<sub>3</sub><sup>-</sup>, and 10 glucose) saturated with 8% CO<sub>2</sub>. This generated a hypercapnic carbon dioxide partial pressure (pCO<sub>2</sub>) of 6.6 kPa at pH 7.5.

## **PGE<sub>2</sub> enzyme-linked immunosorbent assay (ELISA)**

The release of PGE<sub>2</sub> in aCSF during FLRF exposure was assessed by ELISA. The aCSF samples were collected through the perfusion system each minute and stored at -80°C. The prostaglandin E<sub>2</sub> EIA monoclonal kit (Cayman Chemicals, Ann Arbor, MI, USA, cat. no. 514010) was used according to our previously published procedure (Forsberg, Horn et al. 2016).

## **Data analysis**

Data were analyzed as previously described (Forsberg, Horn et al. 2016).

## **Statistics**

Statistical analysis of paired comparisons was performed by Student's *t*-test. Full factorial analysis of variance (ANOVA) was performed when more than one independent variable was compared or for multiple comparisons. Both tests were two-sided. The compared data were of

equal variance and normally distributed. All calculations for the statistical tests were conducted with JMP software (version 11.1., SAS Institute Inc., Cary, NC, USA). In all cases, values of  $p < 0.05$  were considered statistically significant. Data are presented as means  $\pm$  SD. All data sets were compared less than 20 times; thus no statistical corrections were applied. Because these experiments were conducted to provide new descriptive data, no explicit power analysis was performed. Instead, sample sizes similar to previous publications using similar methods were used.

## Acknowledgments

We thank Torkel Mattesson, Wiktor Phillips and Evangelia Tserga for technical assistance. This study was supported by the Swedish Research Council, the Stockholm County Council, the Karolinska Institutet, and grants from the Brain Foundation, M & M Wallenberg, Fraenkel, Axel Tielman, Freemasons Children's House and Swedish National Heart and Lung Foundations.

## Competing interests

EH: employed at the Karolinska Institutet and the Karolinska University Hospital and is a coinventor of a patent application regarding biomarkers and their relation to breathing disorders, WO2009063226. The other authors declare that no competing interests exist.

**Table 1. Number of experiments conducted**

| <i>Figure</i> | <i>Panel</i> | <i>Number of experiments</i> |
|---------------|--------------|------------------------------|
| 1             | b            | 5                            |
|               | c            | 7                            |
|               | d            | 6                            |
|               | e            | 6                            |
|               | f            | 6                            |
|               | g            | 5                            |
|               | h            | 6                            |
|               | i            | 6                            |
|               | j            | 5                            |
|               | k            | 5                            |
|               | l            | 5                            |
|               | m            | 6                            |
| 3             | a            | 19                           |
|               | b            | 22                           |



**Table 2. Statistical analyses and results**

| <i>Figure</i> | <i>Test used</i>     | <i>Exact p-value</i>                           | <i>Degrees of freedom<br/>&amp;<br/>F/t/z/R value</i> |
|---------------|----------------------|------------------------------------------------|-------------------------------------------------------|
| 2             | Student's t-test     | 0.0261                                         | DF = 40                                               |
| 3c            | Full factorial ANOVA | 0.821<br>0.688<br>0.716                        | F=0.071<br>F=0.043<br>F=0.052<br>DFE=18               |
| 3e            | Full factorial ANOVA | 0.416<br>0.237<br>0.0946                       | F=0.064<br>F=0.065<br>F=0.038<br>DFE=21               |
| 4b            | Student's t-test     | 0.0213<br>0.0278<br>0.0342<br>0.0413<br>0.0427 | DF=10, 10, 10, 7, 7                                   |
|               |                      | 0.0147<br>0.0129<br>0.0385<br>0.0311<br>0.0406 | DF=11, 11, 11, 9, 9                                   |
| 4c            | Full factorial ANOVA | 0.416<br>0.759                                 | F=0.029, DFE=6<br>F=0.063, DFE=7                      |
| 5a            | Student's t-test     | 0.0729<br>0.0271<br>0.0014<br>0.0298<br>0.194  | DF=7                                                  |
| 5b            | Student's t-test     | 0.017, 0.44<br>0.014, 0.71<br>0.29, 0.024      | DF=8                                                  |
| 5c            | Student's t-test     | 0.018, 0.41<br>0.74, 0.85<br>0.66, 0.70        | DF=7                                                  |

## References

- Angelova PR, Kasymov V, Christie I, Sheikhabahaei S, Turovsky E, Marina N, Korsak A, Zwicker J, Teschemacher AG, Ackland GL, Funk GD, Kasparov S, Abramov AY and Gourine AV. 2015. Functional Oxygen Sensitivity of Astrocytes. *J Neurosci* **35**:10460-10473. 10.1523/JNEUROSCI.0045-15.2015.
- Brenner M, Kisseberth WC, Su Y, Besnard F and Messing A. 1994. GFAP promoter directs astrocyte-specific expression in transgenic mice. *J Neurosci* **14**:1030-1037.
- Cao X, Li LP, Wang Q, Wu Q, Hu HH, Zhang M, Fang YY, Zhang J, Li SJ, Xiong WC, Yan HC, Gao YB, Liu JH, Li XW, Sun LR, Zeng YN, Zhu XH and Gao TM. 2013. Astrocyte-derived ATP modulates depressive-like behaviors. *Nat Med* **19**:773-777. 10.1038/nm.3162.
- Dong X, Han S, Zylka MJ, Simon MI and Anderson DJ. 2001. A diverse family of GPCRs expressed in specific subsets of nociceptive sensory neurons. *Cell* **106**:619-632.
- Erlachman JS, Leiter JC and Gourine AV. 2010. ATP, glia and central respiratory control. *Respir Physiol Neurobiol* **173**:305-311. S1569-9048(10)00227-2 [pii]  
10.1016/j.resp.2010.06.009.
- Erlachman JS, Li A and Nattie EE. 1998. Ventilatory effects of glial dysfunction in a rat brain stem chemoreceptor region. *J Appl Physiol (1985)* **85**:1599-1604.
- Fiacco TA, Agulhon C, Taves SR, Petravic J, Casper KB, Dong X, Chen J and McCarthy KD. 2007. Selective stimulation of astrocyte calcium in situ does not affect neuronal excitatory synaptic activity. *Neuron* **54**:611-626. S0896-6273(07)00336-4 [pii]  
10.1016/j.neuron.2007.04.032.
- Forsberg D, Horn Z, Tserga E, Smedler E, Silberberg G, Shvarev Y, Kaila K, Uhlen P and Herlenius E. 2016. CO<sub>2</sub>-evoked release of PGE<sub>2</sub> modulates sighs and inspiration as demonstrated in brainstem organotypic culture. *Elife* **5**:e14170. 10.7554/eLife.14170.
- Fukuda Y, Honda Y, Schlafke ME and Loeschcke HH. 1978. Effect of H<sup>+</sup> on the membrane potential of silent cells in the ventral and dorsal surface layers of the rat medulla in vitro. *Pflugers Arch* **376**:229-235.
- Gourine AV and Kasparov S. 2011. Astrocytes as brain interoceptors. *Exp Physiol* **96**:411-416. 10.1113/expphysiol.2010.053165.
- Gourine AV, Kasymov V, Marina N, Tang F, Figueiredo MF, Lane S, Teschemacher AG, Spyer KM, Deisseroth K and Kasparov S. 2010. Astrocytes control breathing through pH-dependent release of ATP. *Science* **329**:571-575. science.1190721 [pii]  
10.1126/science.1190721.

Gourine AV, Llaudet E, Dale N and Spyer KM. 2005. Release of ATP in the ventral medulla during hypoxia in rats: role in hypoxic ventilatory response. *J Neurosci* **25**:1211-1218. 10.1523/JNEUROSCI.3763-04.2005.

Grass D, Pawlowski PG, Hirrlinger J, Papadopoulos N, Richter DW, Kirchhoff F and Hulsmann S. 2004. Diversity of Functional Astroglial Properties in the Respiratory Network. *J. Neurosci.* **24**:1358-1365.

Hawkins VE, Takakura AC, Trinh A, Malheiros-Lima MR, Cleary CM, Wenker IC, Dubreuil T, Rodriguez EM, Nelson MT, Moreira TS and Mulkey DK. 2017. Purinergic regulation of vascular tone in the retrotrapezoid nucleus is specialized to support the drive to breathe. *Elife* **6**. 10.7554/eLife.25232.

Herlenius E, Thonabulsombat C, Forsberg D, Jaderstad J, Jaderstad LM, Bjork L and Olivius P. 2012. Functional stem cell integration assessed by organotypic slice cultures. *Curr Protoc Stem Cell Biol* **Chapter 2**:Unit 2D 13. 10.1002/9780470151808.sc02d13s23.

Hofstetter AO, Saha S, Siljehav V, Jakobsson PJ and Herlenius E. 2007. The induced prostaglandin E2 pathway is a key regulator of the respiratory response to infection and hypoxia in neonates. *Proc Natl Acad Sci U S A* **104**:9894-9899. 10.1073/pnas.0611468104.

Huckstepp RT, Bihi R, Eason R, Spyer KM, Dicke N, Willecke K, Marina N, Gourine AV and Dale N. 2010. Connexin hemichannel-mediated CO<sub>2</sub>-dependent release of ATP in the medulla oblongata contributes to central respiratory chemosensitivity. *J Physiol* **588**:3901-3920. 10.1113/jphysiol.2010.192088.

Huckstepp RT, Eason R, Sachdev A and Dale N. 2010. CO<sub>2</sub>-dependent opening of connexin 26 and related beta connexins. *J Physiol* **588**:3921-3931. 10.1113/jphysiol.2010.192096.

Huxtable AG, Zwicker JD, Alvares TS, Ruangkittisakul A, Fang X, Hahn LB, Posse de Chaves E, Baker GB, Ballanyi K and Funk GD. 2010. Glia contribute to the purinergic modulation of inspiratory rhythm-generating networks. *J Neurosci* **30**:3947-3958. 30/11/3947 [pii] 10.1523/JNEUROSCI.6027-09.2010.

Lin W, Kemper A, McCarthy KD, Pytel P, Wang JP, Campbell IL, Utset MF and Popko B. 2004. Interferon-gamma induced medulloblastoma in the developing cerebellum. *J Neurosci* **24**:10074-10083. 10.1523/JNEUROSCI.2604-04.2004.

Lorier AR, Huxtable AG, Robinson DM, Lipski J, Housley GD and Funk GD. 2007. P2Y1 Receptor Modulation of the Pre-Botzinger Complex Inspiratory Rhythm Generating Network In Vitro. *Journal of Neuroscience* **27**:993-1005. 10.1523/jneurosci.3948-06.2007.

Meigh L, Greenhalgh SA, Rodgers TL, Cann MJ, Roper DI and Dale N. 2013. CO<sub>2</sub> directly modulates connexin 26 by formation of carbamate bridges between subunits. *Elife* **2**:e01213. 10.7554/eLife.01213.

Okada Y, Sasaki T, Oku Y, Takahashi N, Seki M, Ujita S, Tanaka KF, Matsuki N and Ikegaya Y. 2012. Preinspiratory calcium rise in putative pre-Botzinger complex astrocytes. *J Physiol* **590**:4933-4944. 10.1113/jphysiol.2012.231464.

Oku Y, Fresemann J, Miwakeichi F and Hulsman S. 2016. Respiratory calcium fluctuations in low-frequency oscillating astrocytes in the pre-Botzinger complex. *Respir Physiol Neurobiol* **226**:11-17. 10.1016/j.resp.2015.02.002.

Pascual O, Casper KB, Kubera C, Zhang J, Revilla-Sanchez R, Sul JY, Takano H, Moss SJ, McCarthy K and Haydon PG. 2005. Astrocytic purinergic signaling coordinates synaptic networks. *Science* **310**:113-116. 10.1126/science.1116916.

Phillips WS, Herly M, Del Negro CA and Rekling JC. 2016. Organotypic slice cultures containing the preBotzinger complex generate respiratory-like rhythms. *J Neurophysiol* **115**:1063-1070. 10.1152/jn.00904.2015.

Ruangkittisakul A, Kottick A, Picardo MC, Ballanyi K and Del Negro CA. 2014. Identification of the pre-Botzinger complex inspiratory center in calibrated "sandwich" slices from newborn mice with fluorescent Dbx1 interneurons. *Physiol Rep* **2**. 10.14814/phy2.12111.

Ruangkittisakul A, Panaitescu B and Ballanyi K. 2011. K(+) and Ca(2)(+) dependence of inspiratory-related rhythm in novel "calibrated" mouse brainstem slices. *Respir Physiol Neurobiol* **175**:37-48. 10.1016/j.resp.2010.09.004.

Ruangkittisakul A, Schwarzacher SW, Secchia L, Poon BY, Ma Y, Funk GD and Ballanyi K. 2006. High sensitivity to neuromodulator-activated signaling pathways at physiological [K+] of confocally imaged respiratory center neurons in on-line-calibrated newborn rat brainstem slices. *J Neurosci* **26**:11870-11880. 26/46/11870 [pii] 10.1523/JNEUROSCI.3357-06.2006.

Schnell C, Fresemann J and Hulsman S. 2011. Determinants of functional coupling between astrocytes and respiratory neurons in the pre-Botzinger complex. *PLoS One* **6**:e26309. 10.1371/journal.pone.0026309.

Siljehav V, Hofstetter AM, Leifsdottir K and Herlenius E. 2015. Prostaglandin E2 Mediates Cardiorespiratory Disturbances during Infection in Neonates. *J Pediatr* **167**:1207-1213 e1203. 10.1016/j.jpeds.2015.08.053.

Siljehav V, Olsson Hofstetter A, Jakobsson PJ and Herlenius E. 2012. mPGES-1 and prostaglandin E2: vital role in inflammation, hypoxic response, and survival. *Pediatr Res* **72**:460-467. 10.1038/pr.2012.119.

Siljehav V, Shvarev Y and Herlenius E. 2014. IL-1 $\beta$  and prostaglandin E<sub>2</sub> attenuate the hypercapnic as well as the hypoxic respiratory response via prostaglandin E receptor type 3 in neonatal mice. *J Appl Physiol (1985)* **117**:1027-1036. 10.1152/jappphysiol.00542.2014.

Smedler E, Malmersjö S and Uhlen P. 2014. Network analysis of time-lapse microscopy recordings. *Front Neural Circuits* **8**:111. 10.3389/fncir.2014.00111.

Turovsky E, Karagiannis A, Abdala AP and Gourine AV. 2015. Impaired CO<sub>2</sub> sensitivity of astrocytes in a mouse model of Rett syndrome. *J Physiol* **593**:3159-3168. 10.1113/JP270369.

Turovsky E, Theparambil SM, Kasymov V, Deitmer JW, Del Arroyo AG, Ackland GL, Corneveaux JJ, Allen AN, Huentelman MJ, Kasparov S, Marina N and Gourine AV. 2016. Mechanisms of CO<sub>2</sub>/H<sup>+</sup> Sensitivity of Astrocytes. *J Neurosci* **36**:10750-10758. 10.1523/JNEUROSCI.1281-16.2016.

Young JK, Dreshaj IA, Wilson CG, Martin RJ, Zaidi SI and Haxhiu MA. 2005. An astrocyte toxin influences the pattern of breathing and the ventilatory response to hypercapnia in neonatal rats. *Respir Physiol Neurobiol* **147**:19-30. 10.1016/j.resp.2005.01.009.

Young SZ, Platel JC, Nielsen JV, Jensen NA and Bordey A. 2010. GABA(A) Increases Calcium in Subventricular Zone Astrocyte-Like Cells Through L- and T-Type Voltage-Gated Calcium Channels. *Front Cell Neurosci* **4**:8. 10.3389/fncel.2010.00008.
